# Supplementary material for: Changes in the Clinicopathological Demographics of Vulvar Cancer in Japan: Increasing Oldest-Old, Stage Shifting, and Decreasing Cohort-Level Survival
Source: MDPI journal article supplement (doi:10.3390/jcm8122081), 2019-11-29
Supplement: s1 [file s1]

**Supplemental Figure S1. Trends and outcomes in the US cohort.**

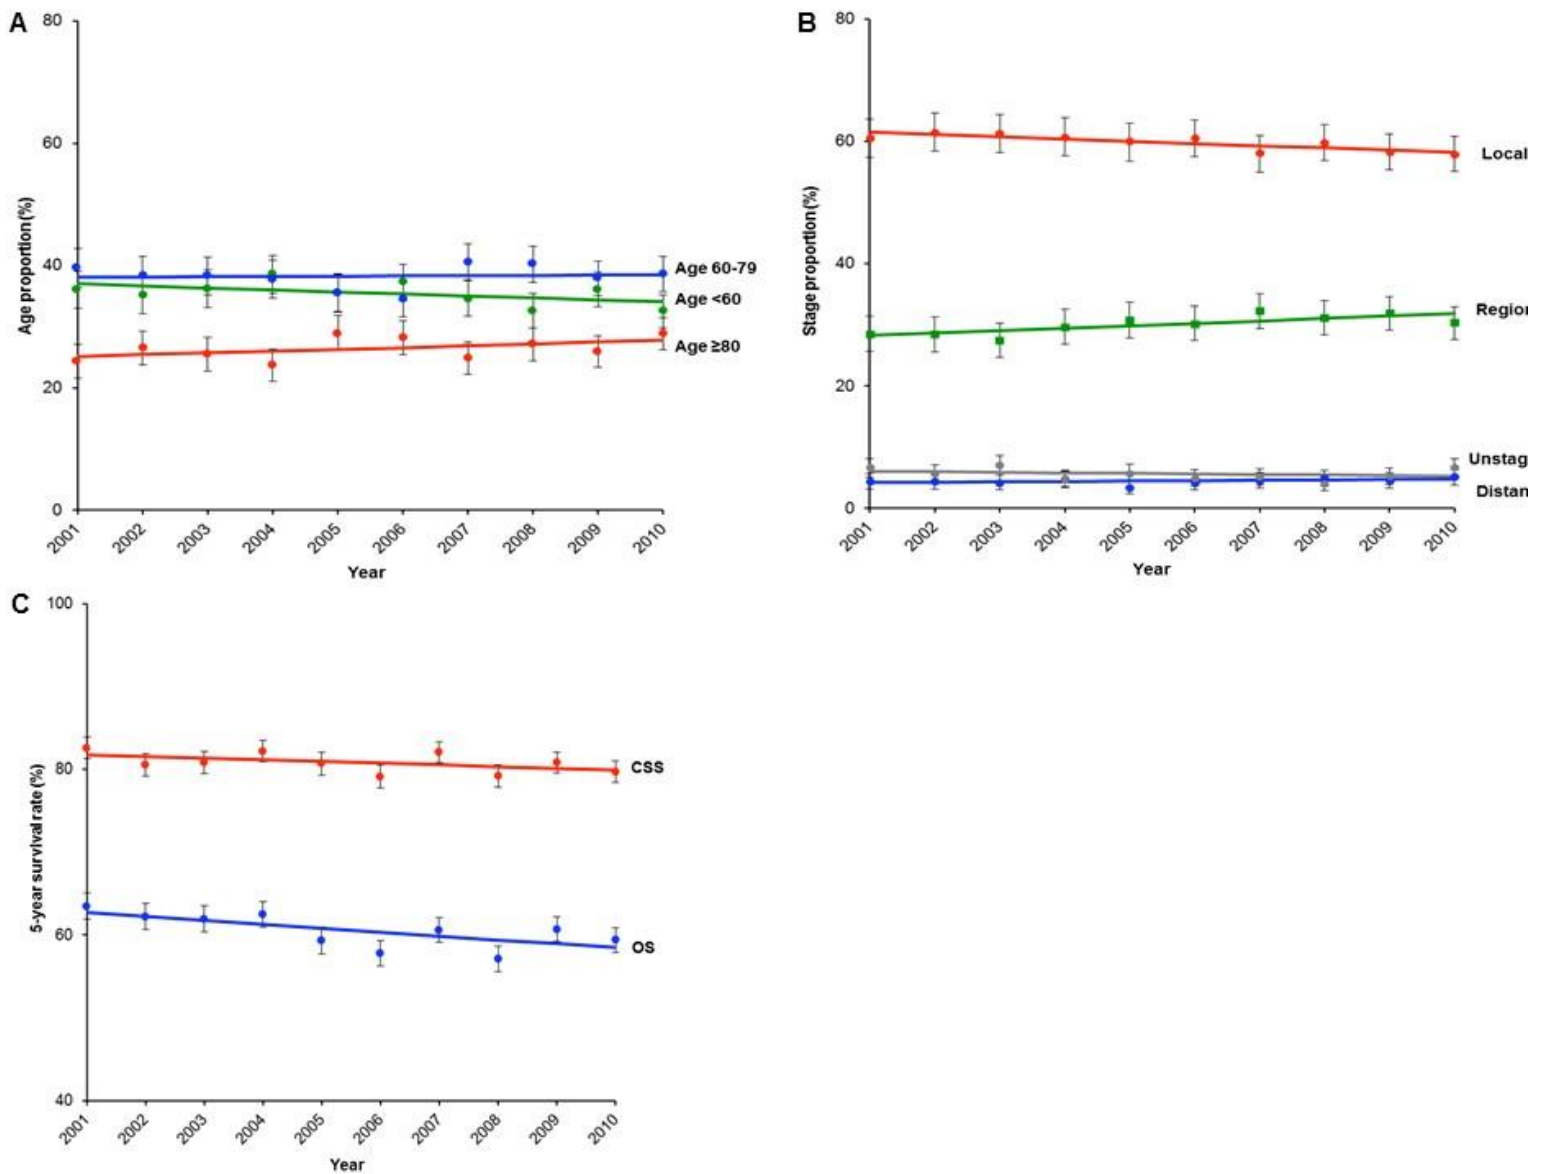

**(A)** Age trends, **(B)** stage trends, and **(C)** 5-year survival rate trends for the US cohort from 2001-2010.

There was no statistically significant change for age and stage groups as well as CSS (all,  $P>0.05$ ).

The 5-year OS rates decreased from 62.7% to 58.5% (6.7% relative decrease, APC  $-0.8$ , 95%CI  $-1.4$  to  $-0.1$ ,  $P=0.027$ ). Bold lines represent the modeled value, and circles represent the observed value with 95% CI.

Abbreviations: CSS, cause-specific survival; OS, overall survival; APC, annual percent change; and CI, confidence interval.

**Table S1. Trends in incidence and survival of vulva cancer in Japan, Europe, and North America**

| Characteristic | Japan           | Europe                    | North America           |
|----------------|-----------------|---------------------------|-------------------------|
| Age            | aging*          | younger <sup>#</sup>      | aging <sup>\$</sup>     |
| VIN            | N/A             | increasing <sup>‡</sup>   | increasing <sup>†</sup> |
| Vulva cancer   | ↑advance stage* | ↑early stage <sup>#</sup> | N/A                     |
| Survival       | worsening*      | no change <sup>#</sup>    | no change <sup>\$</sup> |
| Surgery        | less performed* | N/A                       | N/A                     |
| Radiotherapy   | more performed* | N/A                       | N/A                     |
| Chemotherapy   | more performed* | N/A                       | N/A                     |

N/A: not available, \*:current research, #: Eur J Cancer 2013;49:3872-80,

\$: Gynecol Oncol 2014;134:314-8, ‡: Eur J Gynecol Oncol 2001;22:393-402

†: Obstet Gynecol 2006; 107:1018-22
